# Supplementary material for: Gray Wolf Exposure to Emerging Vector-Borne Diseases in Wisconsin with Comparison to Domestic Dogs and Humans
Source: PubMed Central journal article supplement (PMC5127498; doi:10.1371/journal.pone.0165836), 2016-11-29

- 1 **S1 Fig. Spatial distribution of clusters of exposure to *A. phagocytophilum*, *E. canis* and infection with *D. immitis* in Gray wolves**
- 2 **(1985-2011) and domestic dogs (2007-2013) in Wisconsin.** The maps show the location and extent of the most likely cluster and
- 3 secondary clusters and the counties encompassed by it are shaded. In addition, the log likelihood ratio (LLR), relative risk (RR),
- 4 significance (P-value), expected number of cases (Expected) and observed number of cases (Observed) are shown for each cluster.

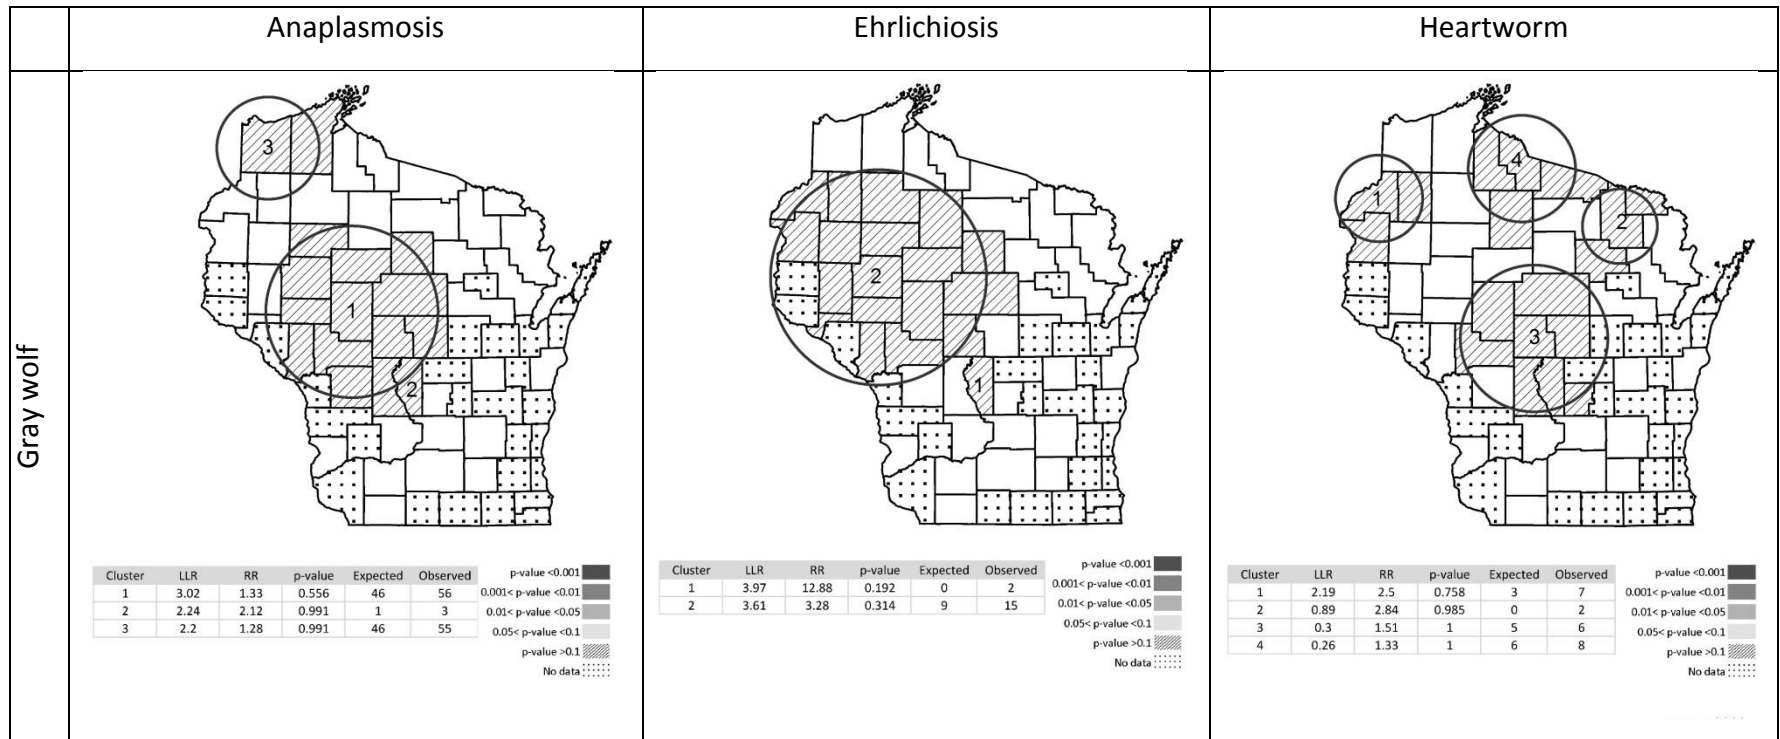

Domestic dog

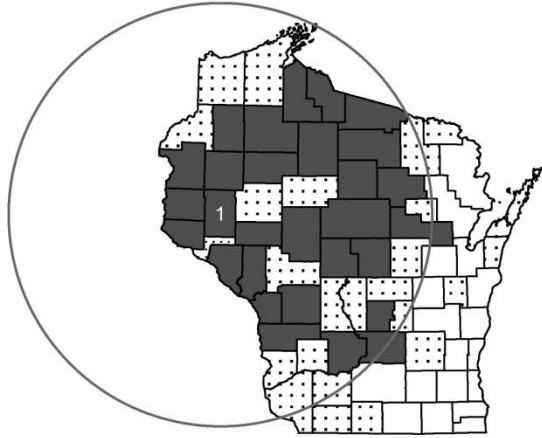

| Cluster | LLR      | RR    | p-value | Expected | Observed |
|---------|----------|-------|---------|----------|----------|
| 1       | 16917.16 | 12.92 | <0.001  | 6,266    | 20,005   |

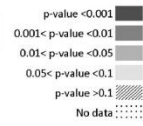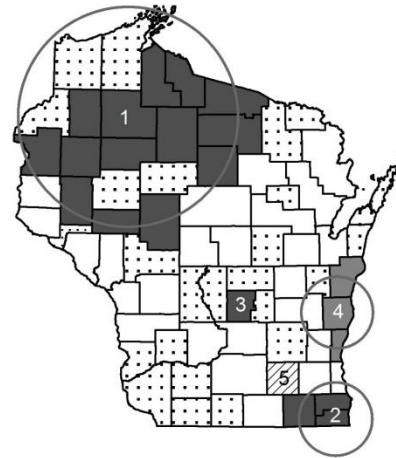

| Cluster | LLR    | RR   | p-value | Expected | Observed |
|---------|--------|------|---------|----------|----------|
| 1       | 111.51 | 3.19 | <0.001  | 102      | 272      |
| 2       | 76.25  | 2.71 | <0.001  | 101      | 238      |
| 3       | 49.77  | 9.92 | <0.001  | 4        | 36       |
| 4       | 8.57   | 1.59 | 0.004   | 65       | 100      |
| 5       | 0.37   | 1.21 | 1       | 18       | 22       |

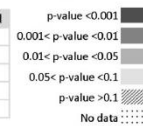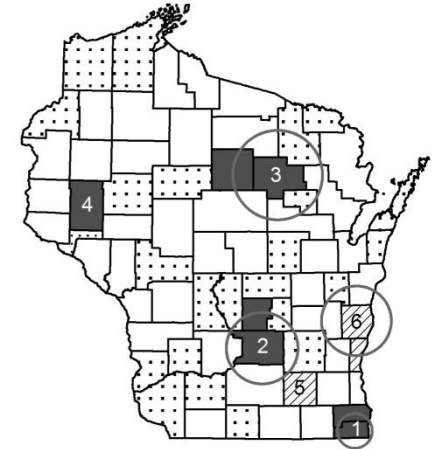

| Cluster | LLR    | RR   | p-value | Expected | Observed |
|---------|--------|------|---------|----------|----------|
| 1       | 270.19 | 5.7  | <0.001  | 79       | 340      |
| 2       | 89.44  | 6.1  | <0.001  | 17       | 95       |
| 3       | 37.59  | 4.56 | <0.001  | 12       | 52       |
| 4       | 16.94  | 3.49 | <0.001  | 9        | 32       |
| 5       | 4.81   | 1.82 | 0.13    | 18       | 33       |
| 6       | 3.26   | 1.41 | 0.448   | 46.06    | 64       |

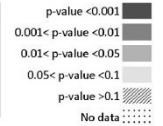

Supplement: pone.0165836.s002.pdf [file pone.0165836.s002.pdf]
