# Supplementary material for: Gray Wolf Exposure to Emerging Vector-Borne Diseases in Wisconsin with Comparison to Domestic Dogs and Humans
Source: PubMed Central journal article supplement (PMC5127498; doi:10.1371/journal.pone.0165836), 2016-11-29

1 **S2 Fig. Gray wolf and dog percent positive test results (number positive/number tested) for**  
2 **antibodies to *Borrelia burgdorferi*, *Anaplasma phagocytophilum* and *Ehrlichia canis* and**  
3 **antigen of *Dirofilaria immitis* in Wisconsin between 2001 and 2007. Wolf exposure to each**  
4 **pathogen were significantly greater than dog exposure at  $\alpha=0.05$  level. Sample size for**  
5 **wolves=178-178 and dogs=51512-109745 depending on the pathogen.**

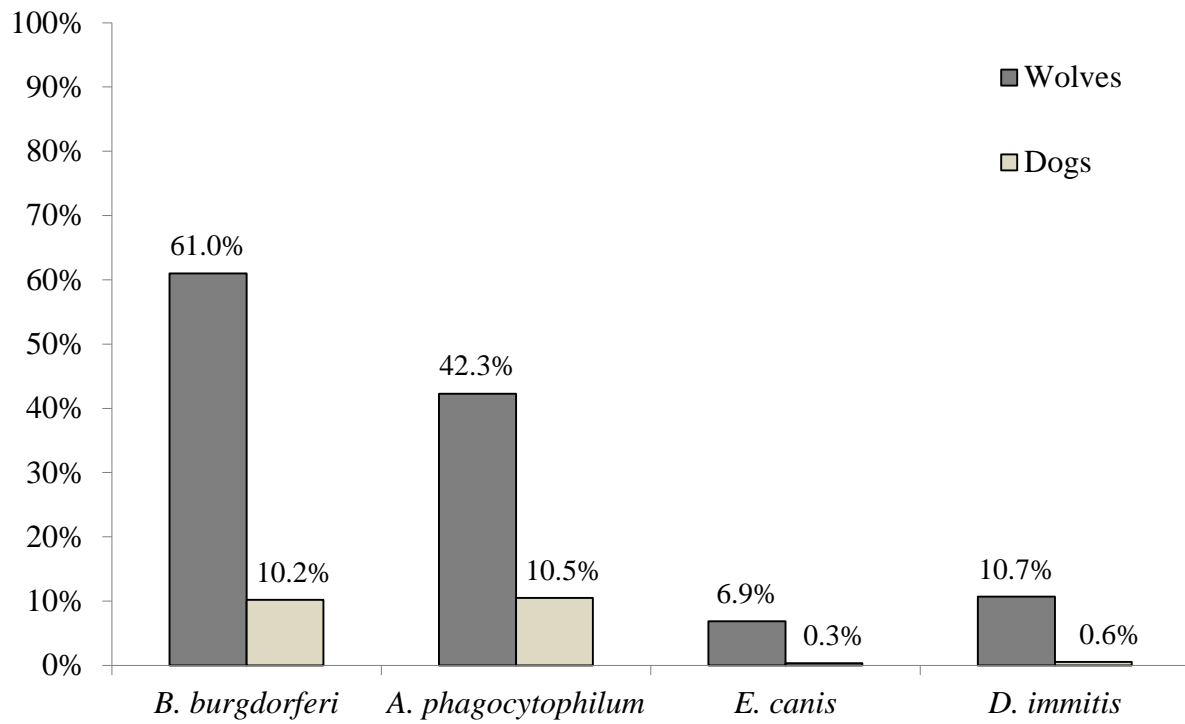

Supplement: pone.0165836.s003.pdf [file pone.0165836.s003.pdf]
