# Supplementary material for: Gray Wolf Exposure to Emerging Vector-Borne Diseases in Wisconsin with Comparison to Domestic Dogs and Humans
Source: PLoS One. 2016 Nov 29;11(11):e0165836. doi: 10.1371/journal.pone.0165836 (PMC5127498; doi:10.1371/journal.pone.0165836)
Supplement: S1 Data — Data elements: age, sex, County of collection, date of collection, year of collection, and SNAP 4Dx test for Lyme, anaplasmosis, ehrlichiosis, and heart worm (0 = negative and 1 = positive). (XLSX) [file pone.0165836.s001.xlsx]

## Sheet: Sheet1
Age	Sex	County	Collection Date	year	LYME	ANAPLASMOSIS	EHRLICHIOSIS	HEART WORM
adult	female	Lincoln	1986-05-16	1986	1	1	1	0
yearling	female	Douglas	1985-05-10	1985	1	0	0	0
adult	male	Oneida	1990-09-21	1990	0	0	0	0
yearling	male	Douglas	1986-05-20	1986	0	0	0	0
adult	male	Oneida	1991-07-23	1991	1	1	1	0
adult	male	Bayfield	1992-09-09	1992	1	0	0	0
yearling	female	Douglas	1987-05-14	1987	0	0	0	0
adult	male	Price	1989-07-14	1989	0	0	0	0
adult	female	Lincoln	1993-11-14	1993	1	1	1	0
adult	male	Ashland	1994-09-20	1994	0	0	0	0
adult	female	Columbia	1994-08-29	1994	0	1	0	0
adult	male	Douglas	1991-08-21	1991	1	1	0	0
pup	female	Douglas	1991-08-22	1991	1	1	0	0
adult	male	Sawyer	1992-05-18	1992	1	1	0	0
adult	female	Douglas	1993-01-14	1993	1	1	0	0
pup	male	Douglas	1993-09-05	1993	0	1	0	0
adult	male	Iron	1995-06-11	1995	0	1	0	0
adult	female	Iron	1995-06-12	1995	0	0	0	0
adult	male	Jackson	1995-05-21	1995	0	0	0	0
adult	male	Ashland	1996-06-05	1996	0	0	0	0
adult	female	Ashland	1996-06-13	1996	0	0	0	0
Yearling	female	Sawyer	1993-07-09	1993	1	0	0	0
adult	male	Douglas	1994-06-16	1994	1	0	0	0
adult	male	Sawyer	1994-05-21	1994	1	0	0	0
adult	female	Iron	1997-12-18	1997	1	0	0	0
adult	female	Juneau	1997-05-12	1997	0	1	0	0
adult	female	Oneida	1997-07-23	1997	1	0	0	0
adult	female	Vilas	1997-07-21	1997	1	0	0	0
Yearling	Female	Clark	1994-11-13	1994	1	0	0	0
adult	male	Iron	1998-10-28	1998	1	0	0	0
adult	female	Lincoln	1998-08-24	1998	1	0	0	0
adult	female	Burnett	1995-05-11	1995	1	0	0	0
adult	male	Burnett	1995-05-04	1995	1	0	1	0
adult	male	Oneida	1999-05-16	1999	1	1	0	0
adult	male	Oneida	1999-04-28	1999	1	1	1	0
adult	male	Oneida	1999-07-30	1999	0	0	0	0
adult	male	Douglas	1995-06-09	1995	1	0	0	0
adult	male	Ashland	2000-06-28	2000	1	1	0	0
adult	male	Iron	2000-06-17	2000	1	1	0	0
adult	female	Oneida	2000-05-10	2000	1	1	0	0
pup	male	Douglas	1995-09-01	1995	0	0	0	0
pup	female	Pepin	1995-03-21	1995	1	0	0	0
yearling	female	Price	1995-05-04	1995	1	1	0	0
adult	female	Douglas	1996-05-31	1996	1	1	0	0
adult	female	Juneau	2001-08-05	2001	1	1	0	0
adult	male	Juneau	2001-08-16	2001	1	1	0	0
adult	male	Juneau	2001-06-12	2001	1	0	0	0
adult	male	Monroe	2001-05-23	2001	1	0	0	0
yearling	female	Douglas	1996-05-23	1996	1	0	0	0
adult	female	Vilas	2001-12-18	2001	1	1	0	1
adult	female	Bayfield	2002-01-11	2002	1	1	0	1
yearling	female	Douglas	1996-07-15	1996	1	1	0	0
adult	female	Douglas	1997-05-28	1997	1	0	0	0
adult	male	Douglas	1997-05-27	1997	1	1	0	0
adult	male	Marinette	2003-05-19	2003	0	0	0	0
adult	male	Oneida	2003-06-10	2003	1	0	0	0
yearling	male	Burnett	1997-06-28	1997	1	1	1	0
yearling	male	Douglas	1997-06-11	1997	0	0	0	0
adult	female	Douglas	1998-06-05	1998	1	1	0	0
adult	male	Bayfield	2004-08-09	2004	1	1	0	0
adult	female	Bayfield	2004-05-21	2004	1	1	0	0
adult	female	Bayfield	2004-06-18	2004	1	0	0	1
yearling	male	Burnett	1998-04-12	1998	1	0	0	0
yearling	female	Price	1998-09-05	1998	1	0	0	0
yearling	female	Washburn	1998-05-13	1998	1	0	0	0
adult	male	Douglas	1999-05-13	1999	1	1	0	0
adult	male	Douglas	1999-06-30	1999	1	1	0	0
adult	female	Jefferson	2004-01-28	2004	1	1	0	0
adult	male	Oconto	2004-07-10	2004	0	0	0	0
adult	male	Portage	2004-05-06	2004	0	0	0	0
adult	female	Price	1999-10-20	1999	1	1	0	0
Yearling	male	Douglas	1999-05-28	1999	1	1	0	0
Yearling	male	Washburn	1999-05-21	1999	1	1	0	1
adult	male	Vilas	2004-06-15	2004	1	1	0	0
adult	male	Bayfield	2005-01-24	2005	0	1	0	0
yearling	female	Washburn	1999-05-25	1999	1	1	0	0
adult	male	Price	2000-05-23	2000	1	0	0	0
pup	male	Sawyer	2000-09-09	2000	0	1	0	0
yearling	female	Price	2000-05-23	2000	1	0	0	1
adult	female	Burnett	2001-05-01	2001	1	1	1	0
adult	female	Burnett	2001-05-26	2001	1	1	1	0
adult	male	Burnett	2001-07-25	2001	1	1	0	0
adult	Female	Price	2001-10-27	2001	1	1	1	0
adult	male	Forest	2005-09-04	2005	1	0	0	0
adult	male	Jackson	2005-04-13	2005	1	1	0	0
adult	male	Marinette	2005-05-18	2005	0	0	0	0
adult	female	Marquette	2005-05-24	2005	0	0	0	1
pup	Female	Burnett	2001-07-25	2001	0	1	0	0
pup	female	Burnett	2001-07-03	2001	0	0	0	0
pup	male	Burnett	2001-07-25	2001	0	0	0	1
pup	male	Burnett	2001-07-25	2001	0	0	0	1
adult	female	Adams	2006-11-23	2006	1	1	0	0
adult	male	Ashland	2006-11-24	2006	1	0	0	0
adult	male	Ashland	2006-07-14	2006	0	0	0	0
adult	male	Ashland	2006-11-15	2006	0	0	0	0
adult	female	Bayfield	2006-06-13	2006	0	0	0	0
adult	male	Bayfield	2006-05-30	2006	1	-	-	0
adult	male	Bayfield	2006-08-01	2006	1	1	0	0
pup	female	Burnett	2001-07-31	2001	0	1	0	0
adult	female	Douglas	2002-01-03	2002	0	1	0	0
adult	female	Price	2002-01-08	2002	1	0	1	0
adult	male	Burnett	2003-05-20	2003	1	1	0	1
adult	male	Columbia	2006-05-20	2006	0	0	0	0
adult	male	Sawyer	2003-06-01	2003	1	1	1	0
adult	male	Barron	2004-06-25	2004	1	0	0	0
adult	male	Barron	2004-08-15	2004	1	1	0	0
adult	female	Douglas	2004-06-19	2004	1	0	0	0
adult	female	Iron	2006-10-26	2006	0	0	0	0
adult	male	Oconto	2006-03-13	2006	0	0	0	0
adult	male	Portage	2006-04-09	2006	1	0	0	0
adult	female	Douglas	2004-08-07	2004	1	0	0	0
adult	male	Douglas	2004-08-06	2004	1	1	0	0
adult	male	Sauk	2006-05-18	2006	1	0	0	0
adult	male	Sauk	2006-10-07	2006	1	0	0	0
adult	male	Douglas	2004-06-13	2004	1	1	0	0
adult	male	Adams	2007-11-02	2007	1	1	1	0
adult	male	Bayfield	2007-05-02	2007	1	0	0	0
adult	male	Bayfield	2007-11-21	2007	1	1	0	0
adult	female	Bayfield	2007-02-20	2007	1	1	0	0
adult	male	Douglas	2004-08-05	2004	1	0	0	0
adult	male	Rusk	2004-10-21	2004	1	1	0	0
adult	female	Rusk	2004-10-14	2004	1	1	1	0
adult	female	Dodge	2007-10-19	2007	1	1	0	0
adult	female	Rusk	2004-10-16	2004	1	0	0	0
pup	male	Douglas	2004-08-06	2004	0	0	0	0
pup	male	Washburn	2004-06-24	2004	0	0	0	0
adult	male	Chippewa	2005-08-31	2005	0	0	0	0
adult	male	Douglas	2005-12-30	2005	1	1	0	0
adult	female	Douglas	2005-07-16	2005	0	0	0	0
adult	male	Douglas	2005-04-05	2005	1	0	0	0
adult	male	Florence	2007-06-27	2007	1	0	0	1
adult	male	Iowa	2007-10-20	2007	0	0	0	0
adult	male	Iron	2007-10-20	2007	1	0	0	0
adult	male	Jackson	2007-03-29	2007	1	1	0	0
adult	female	Oneida	2007-11-21	2007	1	1	0	0
adult	male	Douglas	2005-09-03	2005	1	0	0	0
adult	male	Douglas	2005-08-16	2005	0	0	0	0
adult	female	Douglas	2005-06-21	2005	1	1	1	0
adult	female	Douglas	2005-06-25	2005	1	1	1	1
adult	male	Sauk	2007-10-10	2007	1	0	0	0
adult	female	Polk	2005-07-16	2005	1	0	0	1
adult	female	Shawano	2007-07-02	2007	0	0	0	0
adult	female	Shawano	2007-08-17	2007	1	1	0	0
adult	female	Trempealeau	2007-10-14	2007	1	1	1	0
adult	female	Price	2005-06-06	2005	1	1	1	0
adult	male	Rusk	2005-07-25	2005	1	1	0	0
adult	male	Winnebago	2007-12-29	2007	1	1	0	0
adult	male	Adams	2008-11-30	2008	1	1	1	0
adult	male	Ashland	2008-11-21	2008	1	1	0	0
adult	female	Bayfield	2008-11-22	2008	1	1	0	0
adult	female	Bayfield	2008-08-02	2008	1	1	0	0
adult	male	Bayfield	2008-10-13	2008	1	1	0	0
adult	male	Bayfield	2008-01-25	2008	1	1	0	0
adult	female	Bayfield	2008-04-17	2008	1	0	0	0
adult	male	Sawyer	2005-11-05	2005	1	0	0	0
adult	male	Crawford	2008-05-01	2008	0	1	0	0
pup	female	Douglas	2005-09-12	2005	1	0	0	0
pup	male	Douglas	2005-01-17	2005	1	0	0	0
adult	female	Iron	2008-10-20	2008	1	0	0	0
adult	male	Jackson	2008-02-16	2008	1	1	0	0
adult	male	Juneau	2008-11-29	2008	1	1	0	0
adult	female	Lafayette	2008-12-08	2008	1	0	0	0
adult	female	Monroe	2008-11-23	2008	1	1	0	0
adult	male	Oneida	2008-02-18	2008	1	1	0	0
pup	male	Price	2005-10-04	2005	0	0	0	0
pup	male	Price	2005-09-10	2005	0	0	0	0
adult	female	Vilas	2008-07-17	2008	1	0	0	0
adult	male	Vilas	2008-11-24	2008	1	0	0	0
pup	female	Rusk	2005-08-30	2005	0	0	0	0
pup	male	Rusk	2005-08-30	2005	1	1	0	0
yearling	female	Burnett	2005-09-22	2005	1	1	0	0
adult	male	Wood	2008-10-23	2008	1	1	0	0
adult	female	Wood	2008-04-17	2008	1	1	0	0
adult	female	Ashland	2009-07-10	2009	1	1	0	1
adult	male	Ashland	2009-10-16	2009	1	1	0	0
yearling	female	Burnett	2005-08-10	2005	1	0	0	0
adult	male	Bayfield	2009-01-06	2009	1	1	0	0
adult	female	Bayfield	2009-09-24	2009	0	0	0	0
adult	female	Bayfield	2009-11-30	2009	1	0	0	0
adult	male	Bayfield	2009-12-23	2009	0	1	0	1
yearling	female	Price	2005-10-27	2005	1	1	0	0
adult	female	Burnett	2006-06-14	2006	0	0	0	0
adult	male	Dodge	2009-04-21	2009	1	0	0	0
adult	male	Burnett	2006-05-15	2006	1	0	0	0
adult	male	Burnett	2006-05-16	2006	1	1	0	0
adult	male	Iron	2009-07-29	2009	1	1	0	0
adult	male	Iron	2009-04-11	2009	0	0	0	0
adult	female	Jackson	2009-11-30	2009	1	1	1	0
adult	female	Lincoln	2009-02-21	2009	1	0	0	0
adult	female	Lincoln	2009-10-21	2009	1	1	0	0
adult	male	Lincoln	2009-07-31	2009	1	1	0	0
adult	female	Manitowoc	2009-02-20	2009	0	0	0	0
adult	female	Monroe	2009-11-24	2009	1	0	0	0
adult	male	Oneida	2009-02-10	2009	1	1	0	0
adult	male	Chippewa	2006-11-23	2006	1	1	0	0
adult	female	Douglas	2006-01-05	2006	-	-	-	0
adult	female	Douglas	2006-07-03	2006	1	1	0	0
adult	male	Douglas	2006-07-04	2006	1	0	0	1
adult	female	Vilas	2009-12-01	2009	1	0	0	0
adult	male	Ashland	2010-02-20	2010	1	1	0	0
adult	female	Bayfield	2010-01-06	2010	1	1	0	0
adult	male	Dunn	2006-02-25	2006	1	0	0	0
adult	female	Portage	2010-02-06	2010	1	1	0	1
adult	female	Portage	2010-02-07	2010	0	0	0	0
adult	female	Price	2006-11-25	2006	0	1	0	0
adult	female	Vilas	2010-02-04	2010	0	0	0	0
adult	male	Price	2006-08-02	2006	1	0	0	0
adult	female	Lincoln	2011-06-05	2011	1	1	0	0
adult	female	Sawyer	2006-10-22	2006	0	1	0	0
adult	female	Vilas	2011-05-30	2011	1	1	0	0
pup	male	Lincoln	1986-07-23	1986	1	1	0	0
pup	male	Lincoln	1989-08-09	1989	0	0	0	0
pup	female	Price	2006-04-05	2006	1	0	0	1
pup	female	Sawyer	2006-07-29	2006	0	0	0	1
pup	male	Ashland	1994-09-05	1994	0	0	0	0
pup	female	Ashland	1994-09-05	1994	0	0	0	0
pup	female	Bayfield	1995-08-24	1995	0	1	0	0
pup	female	Bayfield	1995-09-03	1995	0	0	0	0
pup	female	Sawyer	2006-07-29	2006	1	0	0	0
yearling	male	Burnett	2006-06-01	2006	1	0	0	0
pup	female	Bayfield	1996-07-14	1996	0	1	0	0
pup	female	Ashland	1997-06-23	1997	0	0	0	0
pup	female	Oneida	1997-07-30	1997	0	0	0	0
pup	male	Jackson	1998-07-16	1998	0	0	0	0
pup	male	Jackson	1998-08-25	1998	0	0	0	0
pup	female	Lincoln	1999-09-04	1999	0	0	0	0
pup	male	Oneida	2000-07-10	2000	0	0	0	0
pup	male	Oneida	2000-09-12	2000	0	0	0	0
yearling	male	Douglas	2006-07-08	2006	0	0	0	0
adult	female	Burnett	2007-04-10	2007	1	0	0	1
adult	female	Chippewa	2007-04-16	2007	1	1	0	0
adult	male	Chippewa	2007-04-15	2007	1	1	0	0
adult	male	Douglas	2007-07-01	2007	1	1	0	0
adult	male	Douglas	2007-12-30	2007	1	-	-	0
pup	male	Jackson	2001-07-17	2001	1	0	0	0
pup	male	Jackson	2001-07-28	2001	0	0	0	0
pup	Female	Jackson	2001-07-26	2001	0	0	0	0
pup	female	Juneau	2001-08-15	2001	0	0	0	0
pup	female	Juneau	2001-08-15	2001	1	0	0	0
pup	female	Juneau	2001-08-16	2001	0	1	0	0
pup	male	Oneida	2001-09-03	2001	0	0	0	0
pup	male	Oneida	2001-09-17	2001	0	0	0	0
pup	male	Iron	2002-07-29	2002	0	1	0	1
pup	male	Juneau	2002-07-15	2002	0	0	0	1
pup	male	Langlade	2002-07-18	2002	0	0	0	1
pup	female	Bayfield	2003-05-19	2003	1	1	0	0
pup	Female	Jackson	2003-07-23	2003	0	1	0	0
pup	Female	Jackson	2003-07-30	2003	0	0	0	0
pup	male	Jackson	2003-09-09	2003	1	1	0	1
pup	female	Juneau	2003-08-08	2003	0	1	0	0
adult	female	Douglas	2007-12-11	2007	1	1	0	0
pup	female	Jackson	2004-08-21	2004	0	1	0	0
pup	male	Lincoln	2004-06-27	2004	0	0	0	0
adult	male	Douglas	2007-09-10	2007	1	1	0	0
pup	male	Bayfield	2005-10-22	2005	0	0	0	0
adult	male	Douglas	2007-02-08	2007	1	0	0	0
adult	male	Douglas	2007-05-20	2007	1	1	0	0
pup	male	Forest	2005-08-27	2005	0	0	0	0
pup	female	Forest	2005-08-27	2005	0	0	0	0
pup	male	Forest	2005-08-28	2005	0	0	0	0
pup	male	Forest	2005-08-27	2005	0	0	0	0
pup	male	Iron	2005-06-30	2005	0	0	0	0
adult	female	Douglas	2007-03-16	2007	1	0	0	0
adult	female	Price	2007-04-16	2007	1	0	0	0
adult	male	Price	2007-10-02	2007	1	1	1	0
adult	female	Price	2007-10-03	2007	1	1	0	0
pup	male	Lincoln	2006-08-02	2006	0	0	0	0
adult	male	Price	2007-10-03	2007	1	1	0	0
adult	male	Sawyer	2007-08-18	2007	1	1	0	0
adult	male	Washburn	2007-07-15	2007	1	1	0	0
pup	female	Bayfield	2007-10-11	2007	1	0	0	0
pup	female	Bayfield	2007-11-16	2007	1	0	0	0
adult	male	Washburn	2007-10-09	2007	1	0	0	0
pup	male	Burnett	2007-11-01	2007	0	0	0	1
pup	male	Burnett	2007-10-17	2007	0	0	0	0
pup	female	Douglas	2007-07-02	2007	0	0	0	0
pup	female	Douglas	2007-10-01	2007	1	0	0	0
pup	male	Douglas	2007-09-17	2007	0	1	0	0
pup	female	Iron	2007-10-20	2007	0	0	0	-
pup	male	Jackson	2007-08-29	2007	0	0	0	0
pup	female	Douglas	2007-09-22	2007	0	1	0	0
pup	female	Bayfield	2008-02-12	2008	0	0	0	0
pup	female	Bayfield	2008-07-26	2008	0	1	0	-
pup	female	Bayfield	2008-07-26	2008	0	1	0	0
pup	male	Bayfield	2008-08-05	2008	1	1	0	0
pup	male	Bayfield	2008-08-06	2008	0	1	0	0
pup	male	Bayfield	2008-08-07	2008	0	0	0	0
pup	male	Washburn	2007-07-02	2007	0	0	0	0
pup	male	Iron	2008-08-28	2008	0	0	0	1
adult	male	Clark	2008-07-22	2008	1	1	0	0
adult	female	Douglas	2008-01-10	2008	1	1	0	0
adult	female	Douglas	2008-01-29	2008	1	1	0	0
adult	male	Rusk	2008-11-25	2008	1	0	0	0
adult	female	Sawyer	2008-01-29	2008	1	1	0	0
adult	female	Washburn	2008-01-11	2008	1	1	0	0
adult	female	Washburn	2008-04-30	2008	1	0	0	0
adult	female	Washburn	2008-11-06	2008	1	1	0	0
pup	female	Douglas	2008-04-28	2008	1	1	0	0
pup	female	Price	2008-10-02	2008	0	0	0	0
pup	female	Price	2008-07-24	2008	0	0	0	0
pup	male	Price	2008-08-04	2008	1	0	0	0
pup	male	Price	2008-08-12	2008	1	1	0	0
pup	female	Price	2008-08-10	2008	1	1	0	0
pup	female	Rusk	2008-09-25	2008	1	1	0	0
pup	male	Rusk	2008-09-06	2008	0	0	0	0
pup	male	Rusk	2008-08-29	2008	0	1	0	0
pup	male	Vilas	2008-07-17	2008	0	0	0	0
pup	male	Ashland	2009-08-29	2009	0	0	0	1
pup	male	Rusk	2008-08-29	2008	0	1	0	0
pup	female	Jackson	2009-10-15	2009	1	0	0	0
pup	male	Wood	2011-09-16	2011	0	1	0	0
pup	male	Rusk	2008-08-29	2008	1	1	0	0
pup	female	Rusk	2008-08-29	2008	0	0	0	0
pup	female	Rusk	2008-08-29	2008	0	0	0	0
Yearling	male	Lincoln	1987-05-11	1987	1	1	0	1
yearling	female	Lincoln	1988-05-20	1988	1	1	0	0
yearling	female	Lincoln	1988-05-13	1988	1	1	0	0
yearling	male	Oneida	1988-07-22	1988	0	0	0	1
Yearling	female	Lincoln	1989-05-25	1989	1	1	0	1
yearling	male	Ashland	1993-06-25	1993	0	0	0	0
yearling	female	Oneida	1993-05-25	1993	0	0	0	0
pup	unknown	Sawyer	2008-07-22	2008	0	0	0	1
pup	male	Taylor	2008-08-16	2008	1	1	0	0
yearling	male	Lincoln	1994-05-13	1994	1	1	0	0
yearling	male	Lincoln	1994-05-13	1994	1	0	0	0
yearling	male	Lincoln	1994-05-13	1994	1	1	0	0
yearling	male	Jackson	1995-05-21	1995	1	1	0	1
pup	female	Taylor	2008-08-19	2008	1	1	0	0
yearling	female	Bayfield	1996-07-15	1996	1	1	0	0
pup	female	Taylor	2008-08-23	2008	1	1	0	1
pup	female	Taylor	2008-09-17	2008	1	0	0	0
yearling	male	Sawyer	2008-05-15	2008	1	0	0	0
adult	female	Barron	2009-03-07	2009	1	0	0	0
adult	male	Burnett	2009-11-22	2009	1	0	0	0
yearling	male	Lincoln	1998-08-23	1998	1	1	0	0
adult	male	Clark	2009-12-21	2009	1	1	0	0
adult	female	Douglas	2009-05-14	2009	0	1	0	0
adult	male	Dunn	2009-04-25	2009	1	0	0	0
adult	male	Polk	2009-11-20	2009	1	0	0	0
adult	male	Price	2009-05-19	2009	1	0	0	0
yearling	Female	Jackson	2000-09-24	2000	1	1	0	0
adult	male	Price	2009-03-12	2009	1	0	0	0
yearling	female	Vilas	2000-05-11	2000	1	1	0	0
Yearling	female	Bayfield	2003-11-07	2003	0	0	0	0
yearling	female	Ashland	2004-10-13	2004	1	0	0	0
yearling	female	Bayfield	2004-07-23	2004	1	1	0	0
yearling	female	Bayfield	2004-08-25	2004	1	1	0	0
yearling	female	Marathon	2004-04-24	2004	0	0	0	0
yearling	male	Portage	2004-03-30	2004	0	0	0	0
yearling	female	Bayfield	2005-05-15	2005	0	0	0	0
yearling	female	Bayfield	2005-05-17	2005	1	1	0	0
yearling	female	Bayfield	2005-05-30	2005	1	0	0	0
adult	male	Rusk	2009-05-18	2009	1	1	0	0
pup	female	Douglas	2009-12-15	2009	1	0	0	0
yearling	male	Iron	2005-06-14	2005	0	1	0	0
yearling	female	Marathon	2005-03-25	2005	1	1	0	0
yearling	female	Clark	2009-11-13	2009	1	1	0	1
yearling	female	Douglas	2009-07-28	2009	1	1	0	0
yearling	female	Price	2009-07-27	2009	1	1	0	0
yearling	female	Florence	2007-06-14	2007	0	0	0	0
yearling	male	Iron	2007-10-30	2007	1	0	0	0
yearling	male	Lincoln	2007-08-13	2007	1	0	0	0
yearling	male	Dane	2008-03-14	2008	1	0	0	0
yearling	female	Oneida	2008-05-21	2008	1	-	-	0
yearling	male	Portage	2008-04-10	2008	1	1	0	0
yearling	female	Price	2009-04-18	2009	1	0	0	1
adult	male	EauClaire	2010-01-16	2010	1	1	0	0
adult	male	Rusk	2010-01-11	2010	1	0	0	0
yearling	male	Lincoln	2009-10-22	2009	0	0	0	0
yearling	female	Marathon	2009-04-13	2009	1	1	0	0
adult	female	Douglas	2011-06-07	2011	1	1	0	0
adult	male	Sawyer	2011-06-16	2011	1	1	1	0
yearling	male	Oneida	2001-06-03	2001	0	1	0	0
